# Supplementary material
Source: Elsevier journal article supplement (https://www.sciencedirect.com/science/article/pii/S0300893216303451)
Supplement: mmc1 [file S0300893216303451:mmc1.pdf]

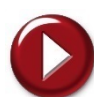

## Supplementary material

# Epicardial Adipose Tissue in the General Middle-aged Population and Its Association With Metabolic Syndrome

## Table of the supplementary material

Mean Differences (95% Confidence Interval) in Epicardial Adipose Tissue (mm) According to Age Among Men and Women Without Metabolic Syndrome

|                                          | 45–54 y   | 55–64 y          | ≥ 65 y           | P for trend |
|------------------------------------------|-----------|------------------|------------------|-------------|
| <b>Men</b>                               |           |                  |                  |             |
|                                          | (n = 73)  | (n = 61)         | (n = 26)         |             |
| <b>Crude</b>                             | 0 (ref.)  | 0.90 (0.31–1.49) | 1.74 (0.97–2.52) | < .001      |
| <b>Multivariable<br/>adjusted model*</b> | 0 (ref.)  | 1.07 (0.47–1.66) | 1.90 (1.12–2.69) | < .001      |
| <b>Women</b>                             |           |                  |                  |             |
|                                          | (n = 124) | (n = 75)         | (n = 29)         |             |
| <b>Crude</b>                             | 0 (ref.)  | 0.68 (0.17–1.18) | 1.58 (0.87–2.30) | < .001      |
| <b>Multivariable<br/>adjusted model*</b> | 0 (ref.)  | 0.67 (0.17–1.17) | 1.54 (0.86–2.22) | < .001      |

\*Adjusted for sex, smoking, body surface area (tertiles), C-reactive protein (dichotomous), overweight, obesity, and waist-to-height ratio (dichotomous).
